# Supplementary material
Source: PubMed Central journal article supplement (PMC3535671)
Supplement: 1216204109_pnas.201216204SI.pdf [file 1216204109_pnas.201216204SI.pdf]

# Supporting Information

Shin et al. 10.1073/pnas.1216204109

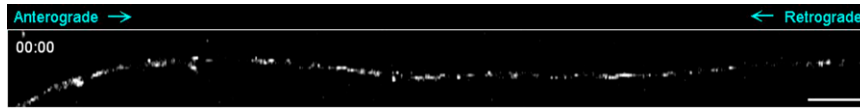

**Movie S1.** Axon transport of Venus-tagged SCG10 is shown by live imaging. Anterograde transport is predominant. Red arrows indicate anterograde movement; yellow arrow indicates retrograde transport. (Scale bar, 10  $\mu\text{m}$ .)

[Movie S1](#)
